# Supplementary material for: The evolution of metastatic upper tract urothelial carcinoma through genomic-transcriptomic and single-cell protein markers analysis
Source: PubMed Central journal article supplement (PMC10948878; doi:10.1038/s41467-024-46320-w), 2024-03-18
Supplement: 41467_2024_46320_MOESM1_ESM.pdf [file 41467_2024_46320_MOESM1_ESM.pdf]

Supplementary Figure 1. Comparison of microsatellite instability (MSI) and total mutational burden (TMB) between primary and metastatic upper tract urothelial carcinoma (UTUC) (n = 24 and 18).

Supplementary Figure 2. Timeline of 7 patients with paired primary and metastatic UTUC. Triangles represent tumor sampling. Each rectangle shows a treatment period of chemotherapy and/or immunotherapy.

Supplementary Figure 3. Comparison of genomic alterations between paired primary and metastatic UTUC.

Supplementary Figure 4. A heatmap of Gene Set Enrichment Analysis (GSEA) enrichment scores using RNA-seq data in primary and metastatic UTUC (n = 6 and 11).

Supplementary Figure 5. Results of CIERSORT analysis using RNA-seq data in primary and metastatic UTUC (n = 1 and 9).

Supplementary Figure 6. Comparison of cellular abundance between immune-depleted and immune-inflamed samples.

Supplementary Figure 7. Intrapatient heterogeneity of tumor phenotype and immune environment in paired primary and metastatic UTUC.

Supplementary Table 1. Patient and sample characteristics.

Supplementary Table 2. Immune-related genes used by RNA-seq based classifier

Supplementary Table 3. A list of the metal-labeled antibodies used in Imaging mass cytometry.

Supplementary Table 4. Exome sequencing statistic summaries.

## Supplementary Figure 1

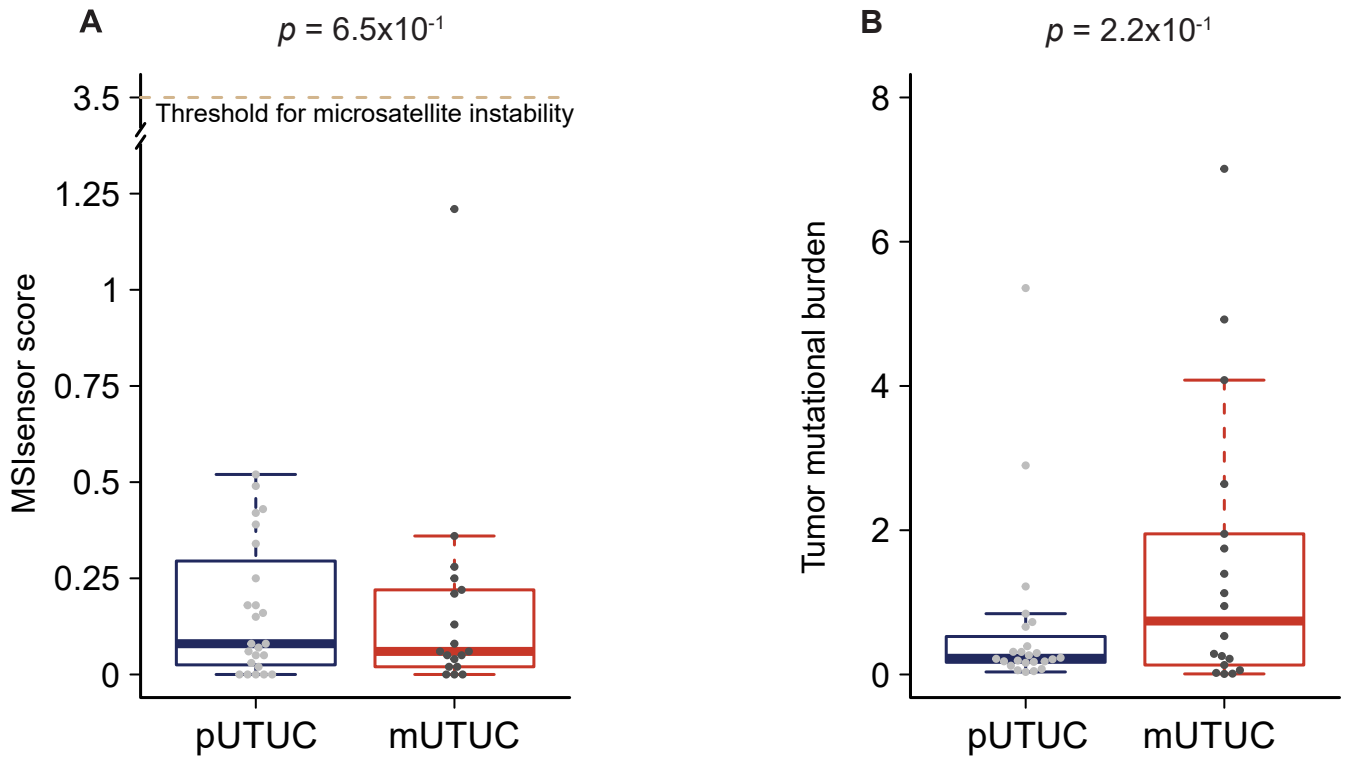

**Supplementary Figure 1. Comparison of microsatellite instability (MSI) and total mutational burden (TMB) between primary and metastatic upper tract urothelial carcinoma (UTUC) (n = 24 and 18).** (a) Box plots showing MSIsensor scores. The cut-off for defining MSI-high versus MS stable samples was 3.5 (MSI-High > 3.5, MS stable < 3.5). (b) Box plots showing TMB burden. Centers, boxes, and whiskers indicate medians, quantiles, and minima/maxima, respectively. Data points beyond the whiskers are potential outliers. Two-sided Mann–Whitney *U*-test without multiple testing correction was used for comparison. pUTUC, primary UTUC; mUTUC, metastatic UTUC. Source data are provided as a Source Data file.

## Supplementary Figure 2

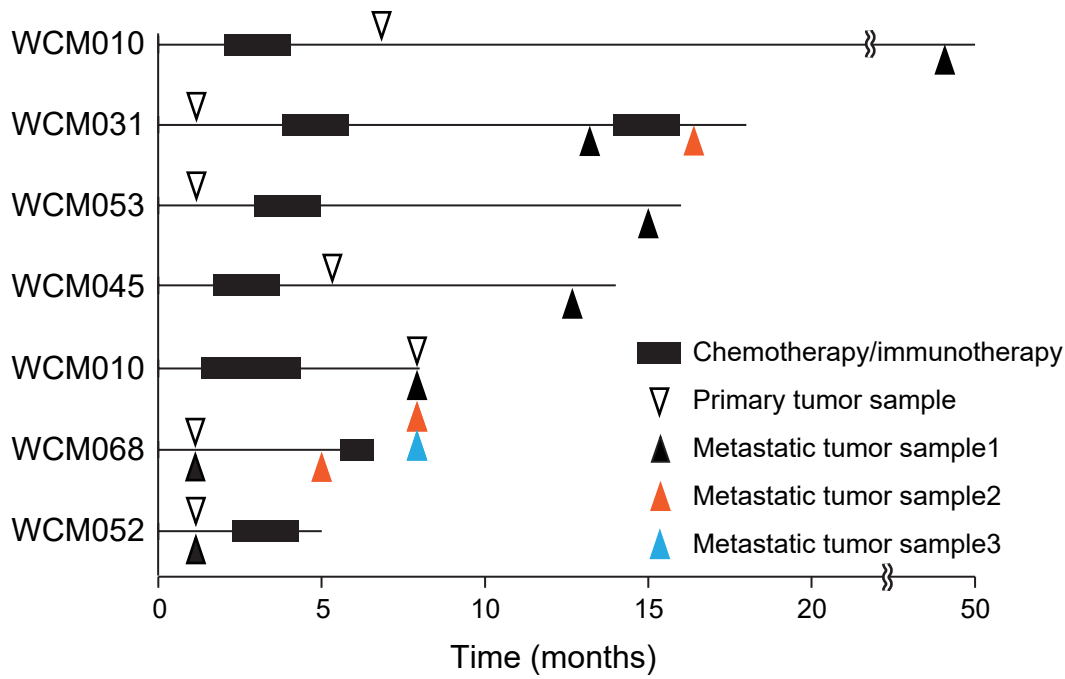

**Supplementary Figure 2. Timeline of 7 patients with paired primary and metastatic UTUC.** Triangles represent tumor sampling. Each rectangle shows a treatment period of chemotherapy and/or immunotherapy.

# Supplementary Figure 3

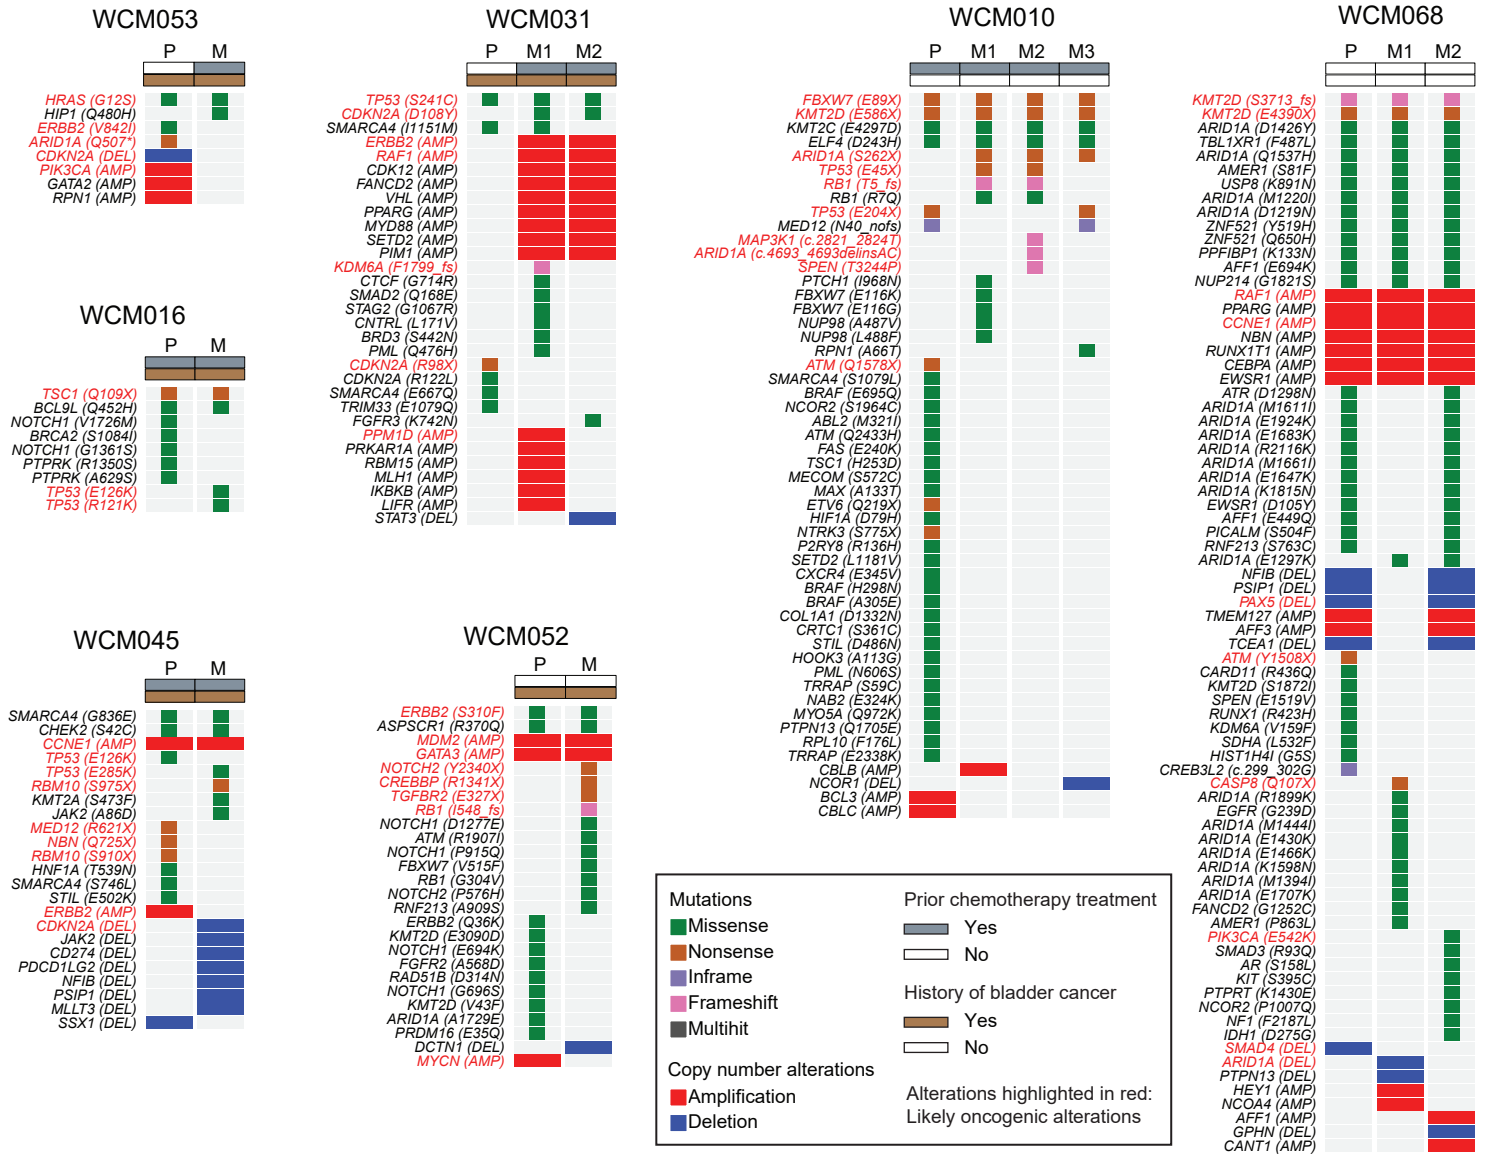

**Supplementary Figure 3. Comparison of genomic alterations between paired primary and metastatic UTUC.** Oncoprints showing somatic mutations (green), amplification (red), and deletion (blue) of cancer genes in primary (P) and matched metastatic (M) UTUC obtained from 7 patients. Discordance in likely oncogenic alterations between primary tumor and paired metastases is shown in red. Source data are provided as a Source Data file.

# Supplementary Figure 4

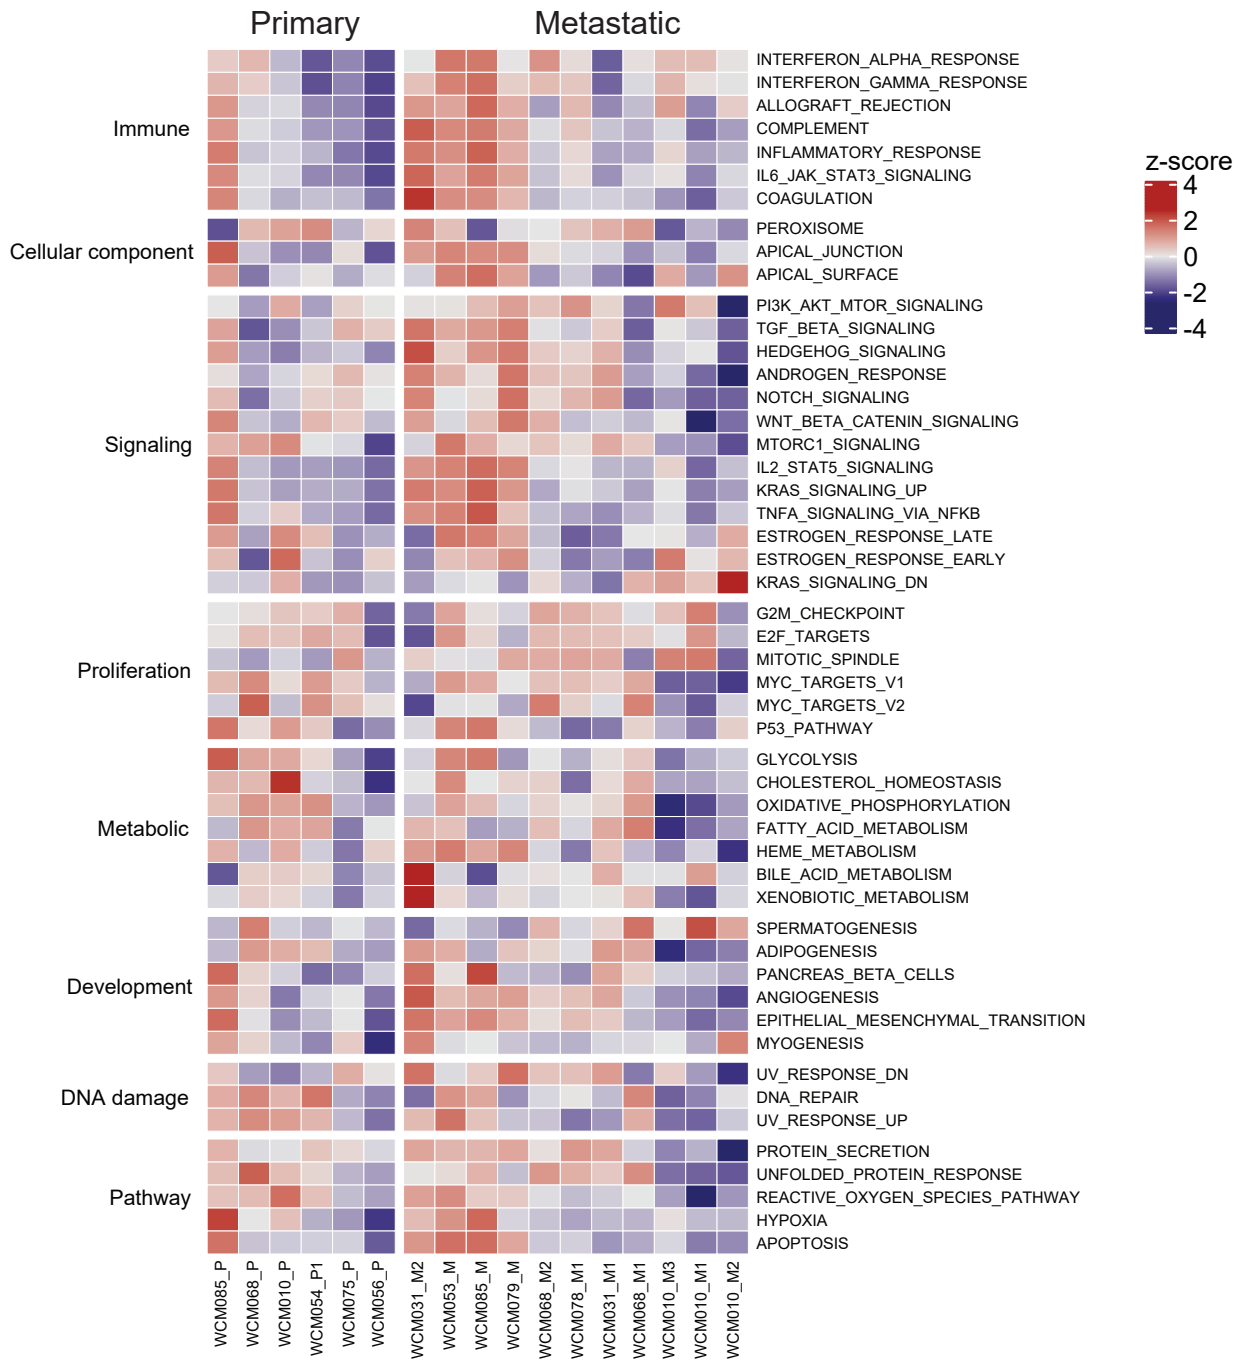

**Supplementary Figure 4. A heatmap of Gene Set Enrichment Analysis (GSEA) enrichment scores using RNA-seq data in primary and metastatic UTUC (n = 6 and 11). No significant enrichment of biological gene sets is shown between primary and metastasis (Wilcoxon signed-rank test, FDR > 0.25). Source data are provided as a Source Data file.**

# Supplementary Figure 5

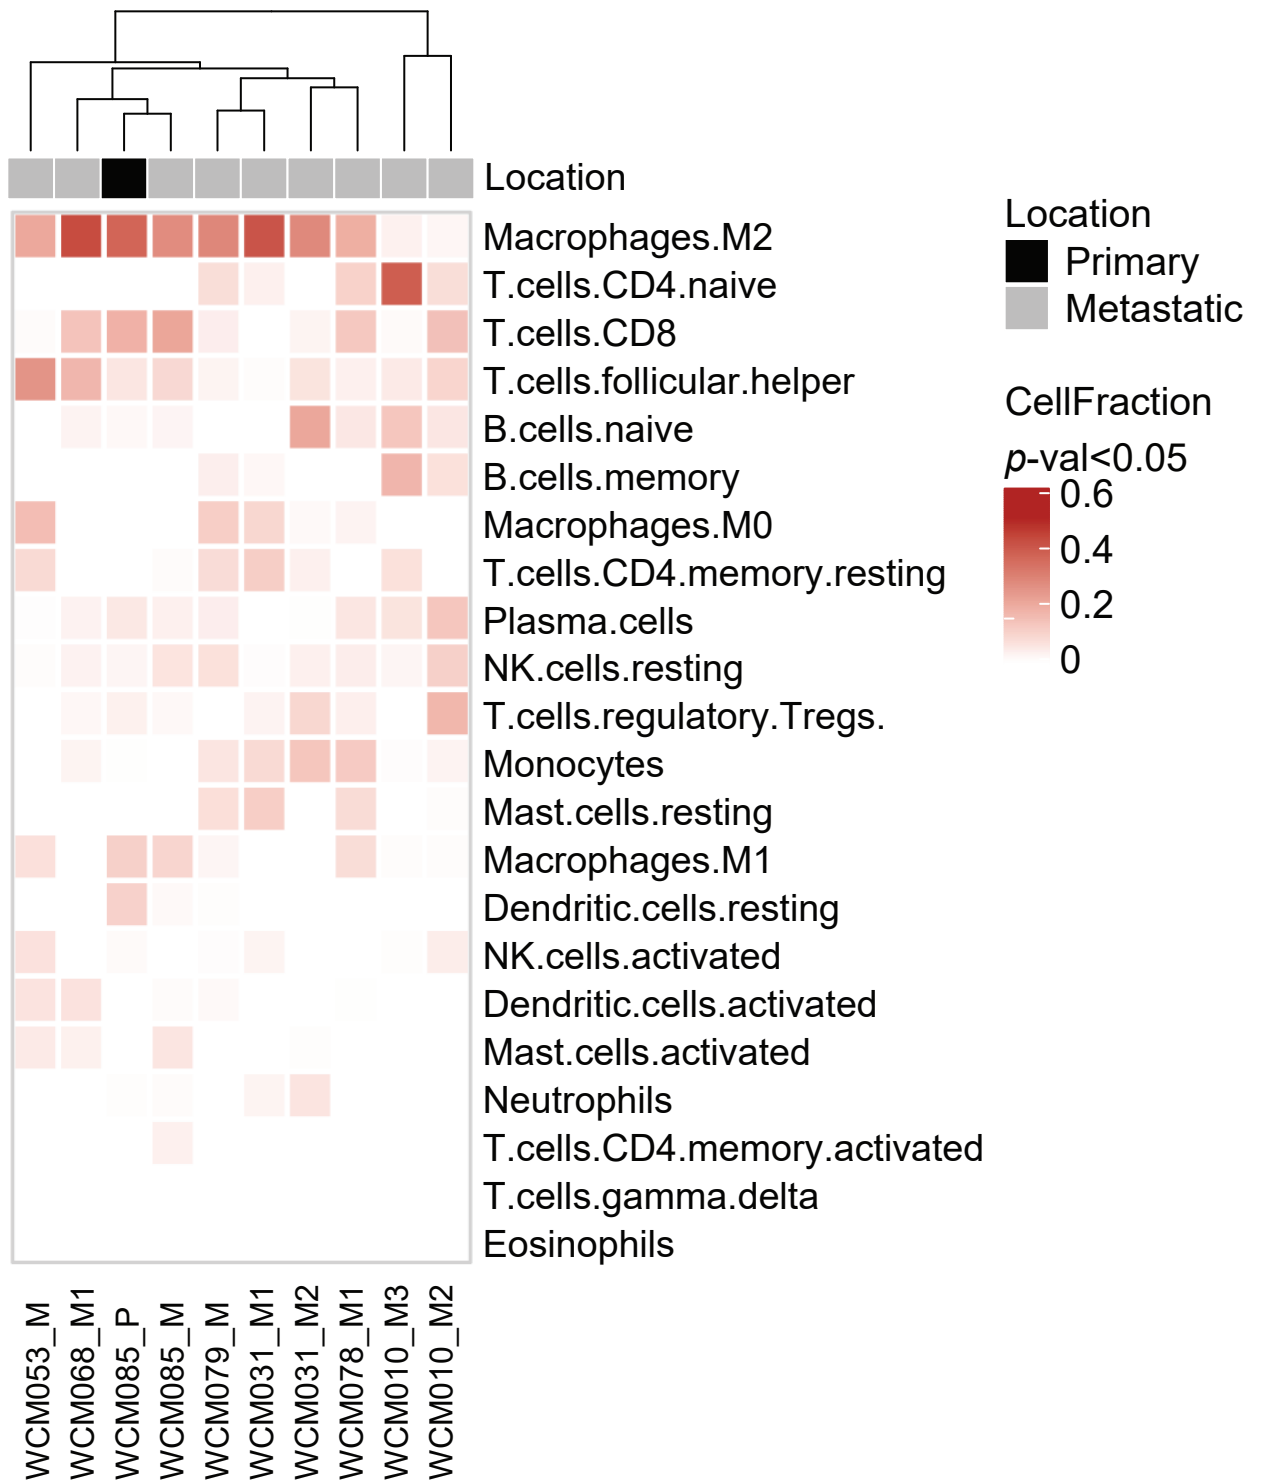

**Supplementary Figure 5. Results of CIERSORT analysis using RNA-seq data in primary and metastatic UTUC (n = 1 and 9).** Samples whose empirical  $p$ -value for the deconvolution was over 0.05 were removed. Source data are provided as a Source Data file.

## Supplementary Figure 6

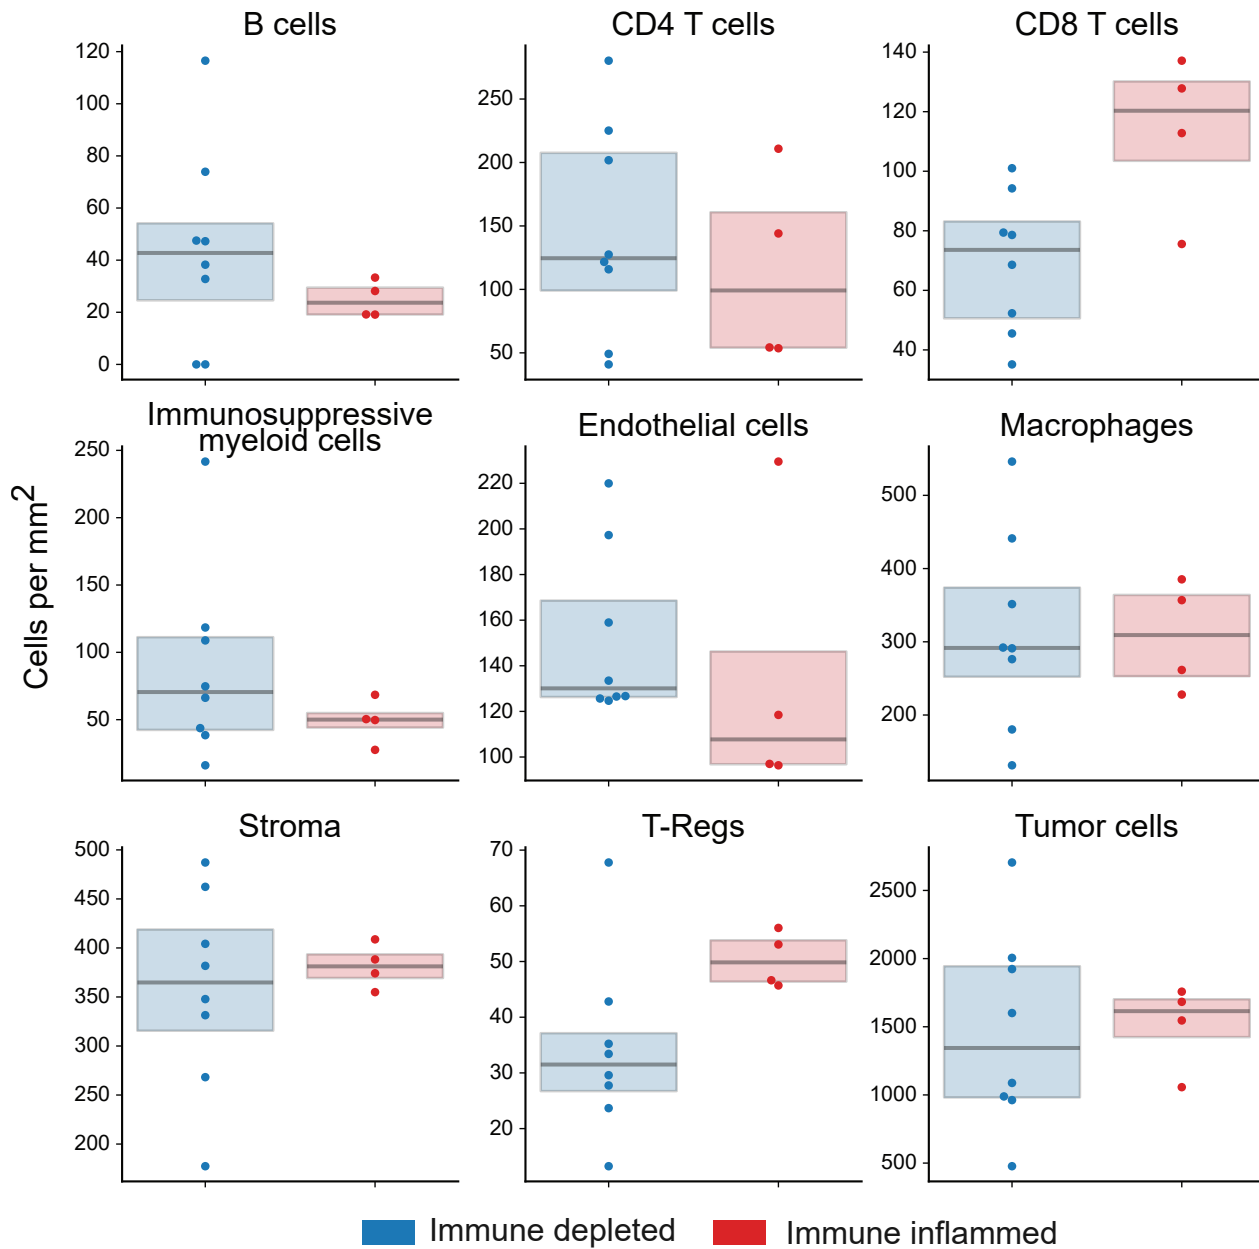

### Supplementary Figure 6. Comparison of cellular abundance between immune-depleted and immune-inflamed samples.

Abundance of cells analyzed by Imaging Mass Cytometry between samples classified as immune-inflamed (4 samples from 3 patients) by the RNA-seq-based classifier and those as immune-depleted (8 samples from 4 patients). Each point represents the normalized abundance of each cell type in each sample. Boxplot centers and box edges indicate medians and 25, and 75 percentiles, respectively. Source data are provided as a Source Data file.

## Supplementary Figure 7

WCM031

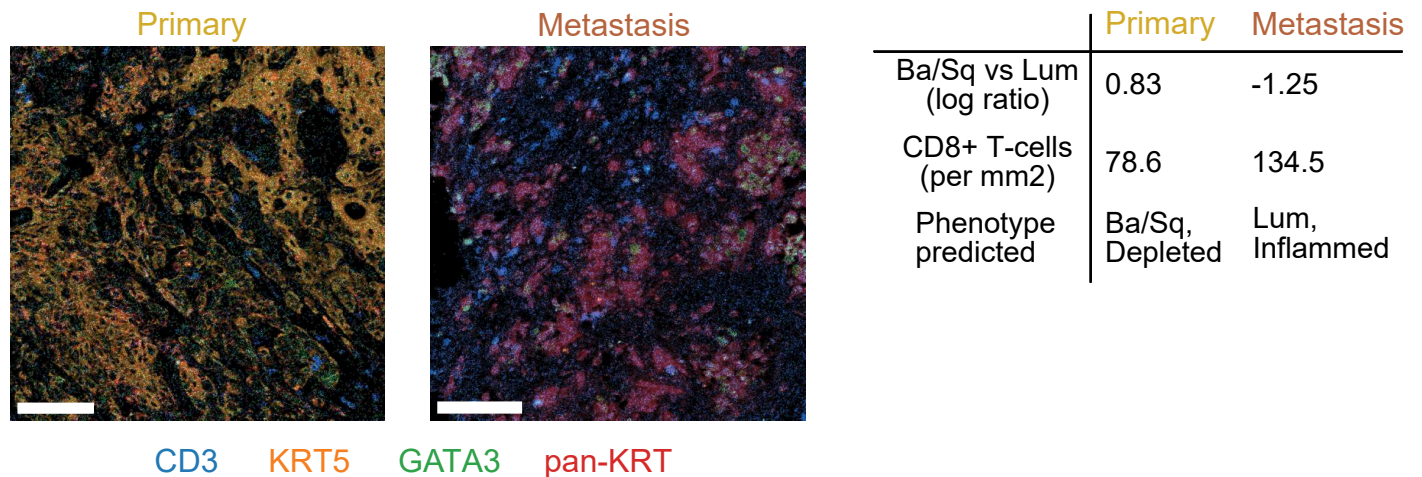

**Supplementary Figure 7. Intrapatient heterogeneity of tumor phenotype and immune environment in paired primary and metastatic UTUC.** Regions of interest (ROI) for samples of patient WCM031 illustrating differential tumor phenotype and immune infiltration between primary and metastasis. Primary tumor cells show cytoplasmic staining of the basal/squamous (Ba/Sq) marker KRT5. Metastatic tumor cells demonstrate nuclear staining of the luminal (Lum) marker GATA3. CD3 staining highlights low T-cell infiltration (depleted) in the primary tumor and high T-cell infiltration (inflamed) in the metastatic tumor. The images are representative of 2 ROIs from primary and 3 ROIs from metastasis. Numeric data of primary and metastatic tumors is a mean value of 2 and 3 ROIs in single experiment. Scale bar, 100  $\mu$ m.



Supplementary Table 1. Patient and sample characteristics.

| Case.ID | Sample.ID | WES | RNA-seq | IMC | Tissue coll | Primary/IV  | Gender | Smoking | h | Chemothe | Immuno | Prior histo | pT  | CLONET_P | Histology_    | Consensus | T-cell sigat | Mutation_ | TMB_SCORE |
|---------|-----------|-----|---------|-----|-------------|-------------|--------|---------|---|----------|--------|-------------|-----|----------|---------------|-----------|--------------|-----------|-----------|
| WCM006  | WCM006_Y  |     | N       | N   | Renal pelv  | Primary     | Female | Former  | N | N        | N      | N           | pT4 | 55       | 70 NA         | NA        |              | 344       | 2.898506  |
| WCM010  | WCM010_Y  |     | Y       | Y   | Lymph nor   | Metastasis  | Female | Former  | Y | Y        | N      | N           | NA  | 98       | 90 LumU       | Depleted  |              | 167       | 1.396217  |
| WCM010  | WCM010_Y  |     | Y       | Y   | Lymph nor   | Metastasis  | Female | Former  | Y | Y        | N      | N           | NA  | 73       | 80 LumP       | Depleted  |              | 151       | 1.128191  |
| WCM010  | WCM010_Y  |     | Y       | Y   | Lymph nor   | Metastasis  | Female | Former  | Y | Y        | N      | N           | NA  | 85       | 80 LumP       | Depleted  |              | 130       | 0.949336  |
| WCM010  | WCM010_Y  |     | Y       | Y   | Renal pelv  | Primary     | Female | Former  | Y | Y        | N      | N           | pT1 | 95       | 80 LumP       | Depleted  |              | 492       | 5.357383  |
| WCM016  | WCM016_Y  |     | N       | N   | Lung        | Metastasis  | Male   | Former  | Y | N        | Y      | Y           | NA  | 57       | 60 NA         | NA        |              | 55        | 0.255722  |
| WCM016  | WCM016_Y  |     | N       | N   | Renal pelv  | Primary     | Male   | Former  | Y | N        | Y      | Y           | pT1 | 50       | 70 NA         | NA        |              | 123       | 0.31435   |
| WCM018  | WCM018_Y  |     | N       | N   | Lung        | Metastasis  | Male   | Former  | N | N        | N      | Y           | NA  | 47       | 80 NA         | NA        |              | 397       | 0.131021  |
| WCM019  | WCM019_Y  |     | N       | N   | Ureter      | Primary     | Male   | Former  | N | N        | Y      | Y           | pT3 | NA       | 70 NA         | NA        |              | 398       | 0.058842  |
| WCM022  | WCM022_Y  |     | N       | N   | Renal pelv  | Primary     | Male   | Former  | Y | N        | N      | N           | pT1 | 36       | 90 NA         | NA        |              | 16        | 0.16232   |
| WCM031  | WCM031_Y  |     | Y       | Y   | Liver       | Metastasis  | Female | Former  | Y | N        | Y      | Y           | NA  | 65       | 50 Stroma-ric | Depleted  |              | 164       | 4.081081  |
| WCM031  | WCM031_Y  |     | Y       | N   | Liver       | Metastasis  | Female | Former  | Y | N        | Y      | Y           | NA  | NA       | 30 LumU       | Depleted  |              | 5         | 0.00791   |
| WCM031  | WCM031_Y  |     | N       | Y   | Renal pelv  | Primary     | Female | Former  | N | N        | Y      | Y           | pT3 | 24       | 80 NA         | NA        |              | 29        | 0.391892  |
| WCM045  | WCM045_Y  |     | N       | N   | Mediastini  | Metastasis  | Male   | Former  | Y | N        | Y      | Y           | NA  | NA       | 30 NA         | NA        |              | 88        | 1.746146  |
| WCM045  | WCM045_Y  |     | N       | N   | Renal pelv  | Primary     | Male   | Former  | Y | N        | Y      | Y           | pT4 | NA       | 30 NA         | NA        |              | 102       | 0.727383  |
| WCM052  | WCM052_Y  |     | N       | N   | Lymph nor   | Metastasis  | Male   | Former  | N | N        | N      | Y           | NA  | 70       | 70 NA         | NA        |              | 86        | 0.286288  |
| WCM052  | WCM052_Y  |     | N       | N   | Ureter      | Primary     | Male   | Former  | N | N        | Y      | Y           | pT1 | 84       | 80 NA         | NA        |              | 97        | 0.296847  |
| WCM053  | WCM053_Y  |     | Y       | Y   | Lung        | Metastasis  | Male   | Never   | Y | N        | N      | Y           | NA  | 58       | 95 Ba/Sq      | Inflamed  |              | 37        | 0.533566  |
| WCM053  | WCM053_Y  |     | N       | Y   | Renal pelv  | Primary     | Male   | Never   | N | N        | N      | N           | pT3 | 80       | 95 NA         | NA        |              | 66        | 1.220329  |
| WCM054  | WCM054_Y  |     | Y       | N   | Renal pelv  | Primary     | Male   | Former  | Y | N        | N      | N           | pT1 | 92       | 90 LumP       | Depleted  |              | 17        | 0.182588  |
| WCM054  | WCM054_Y  |     | N       | N   | Renal pelv  | Primary     | Male   | Former  | N | N        | N      | N           | pT1 | 85       | 80 NA         | NA        |              | 17        | 0.121738  |
| WCM056  | WCM056_Y  |     | Y       | N   | Renal pelv  | Primary     | Female | Never   | Y | N        | N      | N           | pT0 | 97       | 90 LumP       | Depleted  |              | 69        | 0.312863  |
| WCM057  | WCM057_Y  |     | N       | N   | Lymph nor   | Metastasis  | Female | Former  | N | N        | N      | N           | NA  | 67       | 80 NA         | NA        |              | 87        | 1.949829  |
| WCM065  | WCM065_Y  |     | N       | N   | Ureter      | Primary     | Male   | Former  | N | N        | Y      | Y           | pT1 | 85       | 70 NA         | NA        |              | 544       | 0.046913  |
| WCM066  | WCM066_Y  |     | N       | N   | Ureter      | Primary     | Male   | Former  | N | N        | N      | Y           | pT3 | 27       | 60 NA         | NA        |              | 328       | 0.035271  |
| WCM068  | WCM068_Y  |     | Y       | N   | Adrenal gl  | Metastasis  | Male   | Former  | N | N        | N      | N           | NA  | 84       | 90 LumP       | Depleted  |              | 366       | 0.217699  |
| WCM068  | WCM068_Y  |     | Y       | Y   | Peritoneur  | Metastasis  | Male   | Former  | N | N        | N      | N           | NA  | 74       | 90 LumP       | Depleted  |              | 211       | 2.641418  |
| WCM068  | WCM068_Y  |     | Y       | Y   | Renal pelv  | Primary     | Male   | Former  | N | N        | N      | N           | pT4 | 87       | 80 LumP       | Depleted  |              | 364       | 0.231907  |
| WCM071  | WCM071_Y  |     | N       | N   | Renal pelv  | Primary     | Male   | Former  | N | N        | Y      | Y           | pT3 | 84       | 80 NA         | NA        |              | 713       | 0.175422  |
| WCM071  | WCM071_Y  |     | N       | N   | Ureter      | Primary     | Male   | Former  | N | N        | N      | Y           | pT3 | 78       | 80 NA         | NA        |              | 699       | 0.181536  |
| WCM071  | WCM071_Y  |     | N       | N   | Renal pelv  | Primary     | Male   | Former  | N | N        | Y      | Y           | pT3 | 80       | 80 NA         | NA        |              | 643       | 0.192986  |
| WCM072  | WCM072_Y  |     | N       | N   | Ureter      | Primary     | Male   | Former  | N | N        | N      | N           | pT3 | 61       | 70 NA         | NA        |              | 109       | 0.84292   |
| WCM073  | WCM073_Y  |     | N       | N   | Renal pelv  | Primary     | Male   | Former  | Y | N        | N      | N           | pTa | 65       | 90 NA         | NA        |              | 43        | 0.076014  |
| WCM075  | WCM075_Y  |     | Y       | N   | Renal pelv  | Primary     | Female | Never   | N | N        | N      | N           | pT1 | 98       | 90 LumP       | Depleted  |              | 97        | 0.66138   |
| WCM078  | WCM078_Y  |     | Y       | Y   | Bone        | Metastasis  | Male   | Former  | N | N        | N      | N           | NA  | 72       | 80 LumU       | Inflamed  |              | 508       | 7.010704  |
| WCM078  | WCM078_Y  |     | N       | N   | Retroperiti | Local recur | Male   | Former  | N | N        | N      | N           | NA  | 55       | 60 NA         | NA        |              | 444       | 4.921816  |
| WCM079  | WCM079_Y  |     | Y       | Y   | Lung        | Metastasis  | Female | Former  | Y | N        | Y      | Y           | NA  | 19       | 60 LumP       | Depleted  |              | 35        | 0.011681  |
| WCM080  | WCM080_Y  |     | N       | N   | Ureter      | Primary     | Male   | Never   | Y | N        | N      | N           | pT1 | 47       | 40 NA         | NA        |              | 60        | 0.266575  |
| WCM081  | WCM081_Y  |     | N       | N   | Renal pelv  | Primary     | Male   | Former  | N | N        | Y      | Y           | pT3 | 84       | 90 NA         | NA        |              | 82        | 0.211311  |
| WCM082  | WCM082_Y  |     | N       | N   | Retroperiti | Local recur | Male   | Former  | N | N        | N      | N           | NA  | 26       | 40 NA         | NA        |              | 47        | 0.05952   |
| WCM083  | WCM083_Y  |     | N       | N   | Lymph nor   | Metastasis  | Female | Never   | N | N        | N      | N           | NA  | 37       | 30 NA         | NA        |              | 36        | 0.022151  |
| WCM084  | WCM084_Y  |     | N       | N   | Renal pelv  | Primary     | Female | Former  | N | N        | N      | N           | pT2 | 56       | 80 NA         | NA        |              | 50        | 0.217185  |
| WCM085  | WCM085_N  |     | Y       | Y   | Lymph nor   | Metastasis  | Male   | Former  | N | N        | N      | N           | NA  | NA       | 80 Ba/Sq      | Inflamed  |              |           |           |
| WCM085  | WCM085_N  |     | Y       | Y   | Renal pelv  | Primary     | Male   | Former  | N | N        | N      | N           | pT4 | NA       | 80 Ba/Sq      | Inflamed  |              |           |           |

Supplementary Table 2. Immune-related genes used by RNA-seq based classifier

|                 |                 |                 |
|-----------------|-----------------|-----------------|
| <i>MIR650</i>   | <i>NCF2</i>     | <i>MPEG1</i>    |
| <i>IGJ</i>      | <i>CYBB</i>     | <i>HAVCR2</i>   |
| <i>IGLL5</i>    | <i>VSIG4</i>    | <i>RASSF4</i>   |
| <i>CXCL10</i>   | <i>GBP5</i>     | <i>NCKAP1L</i>  |
| <i>CXCL9</i>    | <i>SPI1</i>     | <i>IL10RA</i>   |
| <i>LYZ</i>      | <i>CCL19</i>    | <i>MSR1</i>     |
| <i>UBD</i>      | <i>FOLR2</i>    | <i>F13A1</i>    |
| <i>C1S</i>      | <i>IL7R</i>     | <i>SASH3</i>    |
| <i>C1QB</i>     | <i>CSF1R</i>    | <i>SLAMF8</i>   |
| <i>CXCL13</i>   | <i>SLC15A3</i>  | <i>SLA</i>      |
| <i>C1QC</i>     | <i>LTB</i>      | <i>LST1</i>     |
| <i>HLA-DRB1</i> | <i>HLA-DMA</i>  | <i>GZMK</i>     |
| <i>HLA-DRA</i>  | <i>CD37</i>     | <i>BCL2A1</i>   |
| <i>HLA-DRB5</i> | <i>CCL3</i>     | <i>CYTIP</i>    |
| <i>CCL21</i>    | <i>TREM2</i>    | <i>LAG3</i>     |
| <i>C1QA</i>     | <i>MS4A6A</i>   | <i>CIITA</i>    |
| <i>HLA-DQA1</i> | <i>CD7</i>      | <i>FERMT3</i>   |
| <i>FCGR3A</i>   | <i>FYB</i>      | <i>DOK2</i>     |
| <i>C1R</i>      | <i>SLCO2B1</i>  | <i>PILRA</i>    |
| <i>HLA-DPA1</i> | <i>WARS</i>     | <i>IL4I1</i>    |
| <i>CD74</i>     | <i>MS4A4A</i>   | <i>GZMH</i>     |
| <i>HLA-DQB1</i> | <i>AIF1</i>     | <i>TRPV2</i>    |
| <i>SERPING1</i> | <i>CST7</i>     | <i>CCR1</i>     |
| <i>HLA-DQA2</i> | <i>FPR1</i>     | <i>SAMSN1</i>   |
| <i>TMEM176A</i> | <i>LY96</i>     | <i>IGSF6</i>    |
| <i>TMEM176B</i> | <i>MAFB</i>     | <i>SLC7A7</i>   |
| <i>CCL5</i>     | <i>C3AR1</i>    | <i>CD86</i>     |
| <i>HLA-DMB</i>  | <i>PTPRC</i>    | <i>WAS</i>      |
| <i>RGS1</i>     | <i>ACP5</i>     | <i>STAB1</i>    |
| <i>FCGR2A</i>   | <i>CD4</i>      | <i>CD300A</i>   |
| <i>CD14</i>     | <i>HCK</i>      | <i>SPOCK2</i>   |
| <i>HLA-DRB6</i> | <i>LCP2</i>     | <i>CD8A</i>     |
| <i>FCER1G</i>   | <i>CLEC7A</i>   | <i>S100B</i>    |
| <i>HLA-DPB1</i> | <i>EVI2B</i>    | <i>TNFSF13B</i> |
| <i>IDO1</i>     | <i>SDS</i>      | <i>ARHGAP9</i>  |
| <i>IFI30</i>    | <i>HLA-DQB2</i> | <i>EVI2A</i>    |
| <i>ITGB2</i>    | <i>FGL2</i>     | <i>CYTH4</i>    |
| <i>GZMB</i>     | <i>SELPLG</i>   | <i>ADAP2</i>    |
| <i>TYROBP</i>   | <i>C5AR1</i>    | <i>ABI3</i>     |
| <i>IL2RG</i>    | <i>FAM26F</i>   | <i>ITGAX</i>    |
| <i>LAPTM5</i>   | <i>HLA-DOA</i>  | <i>RCSD1</i>    |
| <i>C2</i>       | <i>PLEK</i>     | <i>TBXAS1</i>   |
| <i>CCL4</i>     | <i>GPR183</i>   | <i>LY86</i>     |
| <i>SRGN</i>     | <i>ELK2AP</i>   | <i>DOCK2</i>    |
| <i>CD52</i>     | <i>PLA2G7</i>   | <i>MYO1F</i>    |
| <i>FPR3</i>     | <i>CD79A</i>    | <i>PIK3AP1</i>  |
| <i>RNASE1</i>   | <i>WIPF1</i>    | <i>PTPN7</i>    |
| <i>CD53</i>     | <i>RNASE6</i>   | <i>ITGAM</i>    |
| <i>MZB1</i>     | <i>CD48</i>     | <i>ADAMDEC1</i> |
| <i>CD163</i>    | <i>HCST</i>     | <i>OSCAR</i>    |
| <i>CXCL11</i>   | <i>CORO1A</i>   | <i>HK3</i>      |
| <i>ALOX5AP</i>  | <i>SLAMF7</i>   | <i>LAT2</i>     |
| <i>CD3E</i>     | <i>C1orf162</i> |                 |
| <i>CPVL</i>     | <i>PRF1</i>     |                 |
| <i>GNLY</i>     | <i>MNDA</i>     |                 |
| <i>NKG7</i>     | <i>CCL13</i>    |                 |
| <i>CD2</i>      | <i>LAIR1</i>    |                 |
| <i>GZMA</i>     | <i>IL2RB</i>    |                 |
| <i>CD3D</i>     | <i>IRF8</i>     |                 |

Supplementary Table 3. A list of the metal-labeled antibodies used in Imaging mass cytometry.

| Metal tag | Antibody                        | Clone                  | Dilution | Stock concentration (mg/ml) | Vendor                    | Catalog    | Citations |
|-----------|---------------------------------|------------------------|----------|-----------------------------|---------------------------|------------|-----------|
| 113In     | Total Histone H3                | D1H2                   | 1:400    | 0.5                         | Cell Signaling Technology | 4499BF     | #1        |
| 141Pr     | Alpha-smooth muscle actin (SMA) | 1A4                    | 1:400    | 0.5                         | Fluidigm                  | 3141017D   | #2        |
| 143Nd     | Vimentin                        | D21H3                  | 1:100    | 0.5                         | Fluidigm                  | 3143027D   | #1        |
| 144Nd     | CD206                           | E2L9N                  | 1:100    | 0.2                         | Cell Signaling Technology | 91992BF    | #3        |
| 146Nd     | CD16                            | EPR16784               | 1:100    | 0.5                         | Fluidigm                  | 3146020D   | #2        |
| 147Sm     | CD163                           | EDHu-1                 | 1:100    | 0.5                         | Fluidigm                  | 3147021D   | #2        |
| 148Nd     | Pan-Keratin                     | C11                    | 1:100    | 0.5                         | Fluidigm                  | 3148020D   | #2        |
| 149Sm     | CD11b                           | SP331                  | 1:50     | 0.5                         | Abcam                     | ab238794   | #4        |
| 150Nd     | PD-1                            | D4W2J                  | 1:50     | 0.5                         | Cell Signaling Technology | 86163BF    | #5        |
| 151Eu     | CD31                            | EP3095                 | 1:50     | 0.5                         | Abcam                     | ab216459   | #1        |
| 152Sm     | CD45                            | D9M8I                  | 1:50     | 0.5                         | Fluidigm                  | 3152018D   | #2        |
| 153Eu     | GATA3                           | D13C9                  | 1:25     | 0.5                         | Cell Signaling Technology | 5852BF     | #6        |
| 155Gd     | FoxP3                           | 236A/E7                | 1:25     | 0.5                         | Invitrogen                | 14-4777-82 | #7        |
| 156Gd     | CD4                             | OT15D9                 | 1:50     | 0.5                         | Novus Biologicals         | NBP2-70357 | #7        |
| 158Gd     | E-Cadherin                      | 24E10                  | 1:50     | 0.5                         | Fluidigm                  | 3158029D   | #2        |
| 159Tb     | CD68                            | KP1                    | 1:50     | 0.5                         | Abcam                     | ab233172   | #1        |
| 161Dy     | CD20                            | L26                    | 1:200    | 0.5                         | Novus Biologicals         | NBP2-80486 | #2        |
| 162Dy     | CD8a                            | C8/144B                | 1:100    | 0.5                         | eBioscience               | 14-0085-82 | #1        |
| 163Dy     | KRT5                            | EP1601Y                | 1:200    | 0.5                         | Abcam                     | ab214586   | #1        |
| 167Er     | GranzymeB                       | EPR20129-217           | 1:50     | 0.5                         | Fluidigm                  | 3167021D   | #2        |
| 168Er     | Ki-67                           | B56                    | 1:50     | 0.5                         | BD Pharmingen             | 556003     | #1        |
| 169Tm     | collagen type I                 | Polyclonal             | 1:300    | 0.5                         | Fluidigm                  | 3169023D   | #2        |
| 170Er     | CD3                             | Polyclonal, C-Terminal | 1:100    | 0.5                         | Fluidigm                  | 3170019D   | #2        |
| 173Yb     | CD45RO                          | UCHL1                  | 1:100    | 0.5                         | Invitrogen                | 14-0457-82 | #5        |
| 175Lu     | PD-L1                           | SP142                  | 1:25     | 0.5                         | Abcam                     | ab236238   | #7        |
| 176Yb     | CD11c                           | EP1347Y                | 1:50     | 0.5                         | Abcam                     | ab216655   | #5        |

#1 Kuett, L. et al. Three-dimensional imaging mass cytometry for highly multiplexed molecular and cellular mapping of tissues and the tumor microenvironment. *Nat Cancer* 3, 122–133, doi:10.1038/s43018-021-00301-w (2022).

#2 Chang Q, Ornatsky O, Hedley D. Staining of frozen and formalin-fixed, paraffin-embedded tissues with metal-labeled antibodies for Imaging Mass Cytometry analysis. *Current Protocols in Cytometry* 82: 12.47.1–12.47.8, doi: 10.1002/cpcy.29 (2017).

#3 Rendeiro, A. F. et al. The spatial landscape of lung pathology during COVID-19 progression. *Nature* 593, 564-569, doi:10.1038/s41586-021-03475-6 (2021).

#4 Li B et al. Myeloid-Derived Suppressive Cells Deficient in Liver X Receptor  $\alpha$  Protected From Autoimmune Hepatitis. *Front Immunol* 12:732102, doi: 10.3389/fimmu.2021.732102 (2021).

#5 Ijsselstein ME, van der Breggen R, Farina Sarasqueta A, Koning F, de Miranda NFCC. A 40-Marker Panel for High Dimensional Characterization of Cancer Immune Microenvironments by Imaging Mass Cytometry. *Front Immunol.* 10:2534, doi:10.3389/fimmu.2019.02534 (2019).

#6 [https://antibodyregistry.org/search.php?q=AB\\_10835690](https://antibodyregistry.org/search.php?q=AB_10835690)

#7 Alnajar H. et al. Tumor-immune microenvironment revealed by Imaging Mass Cytometry in a metastatic sarcomatoid urothelial carcinoma with a prolonged response to pembrolizumab. *Cold Spring Harb Mol Case Stud.* 8:a006151, doi:10.1101/mcs.a006151 (2022).

Supplementary Table 4: Exome sequencing statistic summaries

| Sample ID   | total reads | percentage of captured reads | average coverage |
|-------------|-------------|------------------------------|------------------|
| WCM006_P    | 84,367,815  | 88.87%                       | 111              |
| WCM006_Ctrl | 83,197,035  | 86.26%                       | 107              |
| WCM010_P    | 86590826    | 85.75%                       | 112              |
| WCM010_M1   | 82,936,503  | 84.22%                       | 104              |
| WCM010_M2   | 85014281    | 85.53%                       | 110              |
| WCM010_M3   | 82315255    | 85.69%                       | 107              |
| WCM010_Ctrl | 78193110    | 84.41%                       | 99               |
| WCM016_P    | 72,996,642  | 94.01%                       | 99               |
| WCM016_M    | 88,162,658  | 85.80%                       | 114              |
| WCM016_Ctrl | 84,480,477  | 85.34%                       | 108              |
| WCM018_M    | 77,972,152  | 91.87%                       | 105              |
| WCM018_Ctrl | 87,348,284  | 87.72%                       | 114              |
| WCM019_P    | 88,179,162  | 86.92%                       | 112              |
| WCM019_Ctrl | 103,376,657 | 83.02%                       | 128              |
| WCM022_P    | 68,180,823  | 87.17%                       | 86               |
| WCM022_Ctrl | 72,038,258  | 84.10%                       | 88               |
| WCM031_P    | 71,372,403  | 88.14%                       | 92               |
| WCM031_M1   | 65,823,429  | 82.91%                       | 81               |
| WCM031_M2   | 49,836,783  | 81.30%                       | 60               |
| WCM031_Ctrl | 69,805,994  | 83.13%                       | 86               |
| WCM045_P    | 59,798,228  | 96.24%                       | 80               |
| WCM045_M    | 45,846,798  | 91.96%                       | 60               |
| WCM045_Ctrl | 64,647,599  | 85.53%                       | 82               |
| WCM052_P    | 55,916,692  | 88.34%                       | 72               |
| WCM052_M    | 51,947,475  | 88.96%                       | 68               |
| WCM052_Ctrl | 70,295,221  | 86.44%                       | 89               |
| WCM053_P    | 75,181,046  | 86.04%                       | 94               |
| WCM053_M    | 68,513,098  | 86.04%                       | 84               |
| WCM053_Ctrl | 76,647,892  | 86.22%                       | 96               |
| WCM054_P1   | 57,899,049  | 87.13%                       | 72               |
| WCM054_P2   | 61,323,016  | 91.09%                       | 80               |
| WCM054_Ctrl | 64,838,218  | 87.06%                       | 83               |
| WCM056_P    | 62,531,259  | 85.76%                       | 79               |
| WCM056_Ctrl | 59,928,390  | 87.98%                       | 77               |
| WCM057_M    | 59,963,511  | 84.60%                       | 76               |
| WCM057_Ctrl | 62,252,544  | 85.68%                       | 79               |
| WCM065_P    | 77,336,831  | 93.99%                       | 105              |
| WCM065_Ctrl | 68,147,938  | 88.32%                       | 88               |
| WCM066_P    | 73,332,007  | 94.25%                       | 98               |
| WCM066_Ctrl | 68,228,930  | 88.94%                       | 89               |
| WCM068_P    | 66,064,418  | 86.16%                       | 85               |
| WCM068_M1   | 65,501,644  | 86.74%                       | 85               |
| WCM068_M2   | 88361510    | 83.45%                       | 111              |
| WCM068_Ctrl | 61,576,487  | 86.94%                       | 79               |
| WCM071_P1   | 80,881,863  | 93.95%                       | 110              |
| WCM071_P2   | 79,837,841  | 94.25%                       | 108              |
| WCM071_P3   | 80,014,698  | 94.02%                       | 108              |
| WCM071_Ctrl | 92,992,241  | 86.43%                       | 120              |
| WCM072_P    | 91114638    | 88.56%                       | 119              |
| WCM072_Ctrl | 83937104    | 85.02%                       | 108              |
| WCM073_P    | 87,215,644  | 91.75%                       | 117              |
| WCM073_Ctrl | 70,477,833  | 88.58%                       | 93               |
| WCM075_P    | 73,932,941  | 83.43%                       | 92               |
| WCM075_Ctrl | 72,796,833  | 85.55%                       | 93               |
| WCM078_M1   | 86,440,090  | 87.17%                       | 113              |
| WCM078_M2   | 82,265,799  | 84.24%                       | 104              |
| WCM078_Ctrl | 84600526    | 86.16%                       | 109              |
| WCM079_M    | 82,192,206  | 83.30%                       | 103              |
| WCM079_Ctrl | 85,825,011  | 90.58%                       | 116              |
| WCM080_P    | 68,189,832  | 87.13%                       | 87               |
| WCM080_Ctrl | 64,393,280  | 90.53%                       | 84               |
| WCM081_P    | 67,603,930  | 89.66%                       | 89               |
| WCM081_Ctrl | 63,186,802  | 82.19%                       | 77               |
| WCM082_M    | 86,601,506  | 87.57%                       | 113              |
| WCM082_Ctrl | 90,466,937  | 77.72%                       | 106              |
| WCM083_M    | 99,131,758  | 78.25%                       | 117              |
| WCM083_Ctrl | 89,341,769  | 77.08%                       | 105              |
| WCM084_P    | 108,957,788 | 83.06%                       | 136              |
| WCM084_Ctrl | 102,564,963 | 80.65%                       | 125              |
