# Supplementary material for: The evolution of metastatic upper tract urothelial carcinoma through genomic-transcriptomic and single-cell protein markers analysis
Source: PubMed Central journal article supplement (PMC10948878; doi:10.1038/s41467-024-46320-w), 2024-03-18
Supplement: 41467_2024_46320_MOESM3_ESM.pdf [file 41467_2024_46320_MOESM3_ESM.pdf]

1  
2  
3  
4  
5

**Description of Additional Supplementary Files**

**Supplementary Data 1** : A list of all non-synonymous mutations and copy number alterations detected by WES
